# Supplementary material for: Peptide Mediated Antimicrobial Dental Adhesive System
Source: PubMed Central journal article supplement (PMC7857482; doi:10.3390/app9030557), 2019-02-08
Supplement: NIHMS1015942-supplement-Supplementary_Material.pdf [file NIHMS1015942-supplement-Supplementary_Material.pdf]

## Supplementary Material

# Peptide Mediated Antimicrobial Dental Adhesive System

Sheng-Xue Xie <sup>1</sup>, Kyle Boone <sup>1,2</sup>, Sarah Kay VanOosten <sup>1,2</sup>, Esra Yuca <sup>1,3</sup>, Linyong Song <sup>1</sup>, Xueping Ge <sup>1</sup>, Qiang Ye <sup>1</sup>, Paulette Spencer <sup>1,2,4</sup>, and Candan Tamerler <sup>1,2,4,\*</sup>

<sup>1</sup> Institute for Bioengineering Research, University of Kansas, 1530 W. 15th St., Lawrence, KS 66045, USA; sxie@ku.edu (S.X.X.); k097b443@ku.edu (K.B.); sarah.vanoosten@ku.edu (S.K.V.); e782y752@ku.edu (E.Y.); LeonSong@ku.edu (L.S.); xpge718@gmail.com (X.G.); yeq@ku.edu (Q.Y.); pspencer@ku.edu (P.S.)

<sup>2</sup> Bioengineering Program, 1530 W. 15th St., University of Kansas, Lawrence, KS 66045, USA

<sup>3</sup> Department of Molecular Biology and Genetics, Yildiz Technical University, 34210, Istanbul, Turkey; eyuca@yildiz.edu.tr (E.Y.)

<sup>4</sup> Department of Mechanical Engineering, 1530 W. 15th St., University of Kansas, Lawrence, KS 66045, USA

\* Correspondence: ctamerler@ku.edu

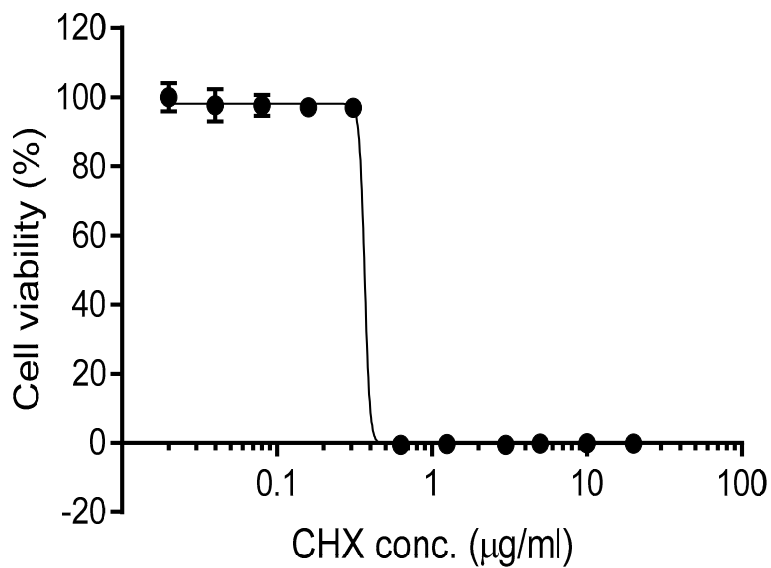

**Figure S1.** MIC (0.63 µg/ml) and IC<sub>50</sub> (0.37 µg/ml) of CHX against *S. mutans* (R<sup>2</sup> = 1.0).

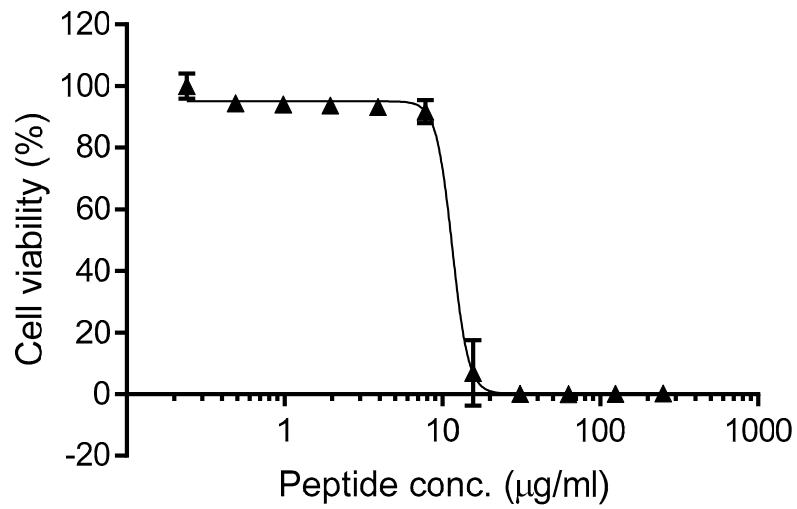

**Figure S2.** MIC (31.3 µg/ml) and IC<sub>50</sub> (11.55 µg/ml) of GH12 against *S. mutans* ( $R^2 = 0.99$ ).

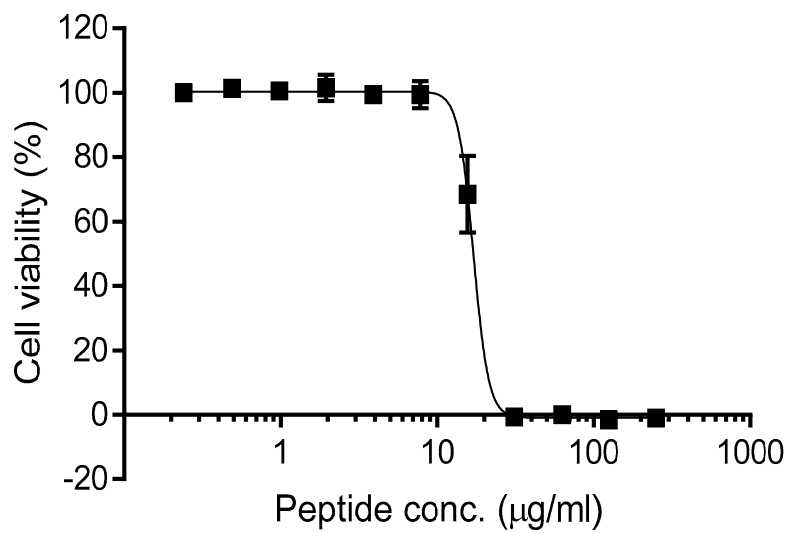

**Figure S3.** MIC (31.3 µg/ml) and IC<sub>50</sub> (17.05 µg/ml) of GH12-M1 against *S. mutans* ( $R^2 = 0.99$ ).

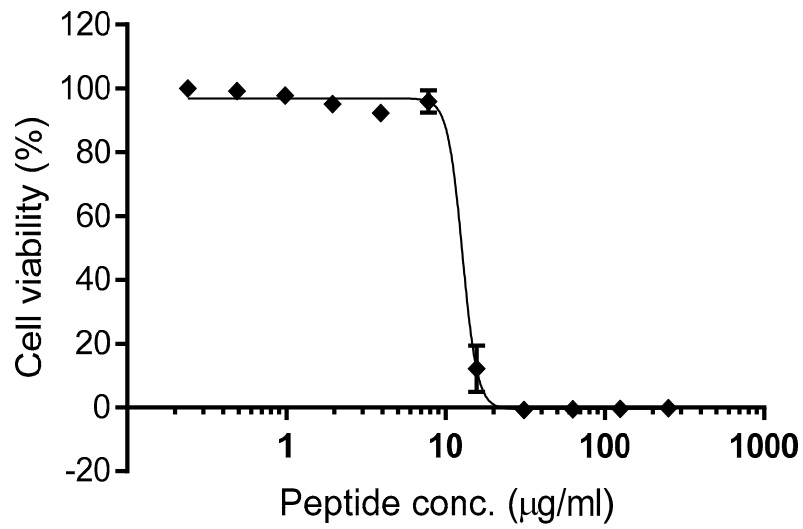

**Figure S4.** MIC (31.3 µg/ml) and IC<sub>50</sub> (12.75 µg/ml) of GH12-M1 against *S. mutans* ( $R^2 = 1.0$ ).

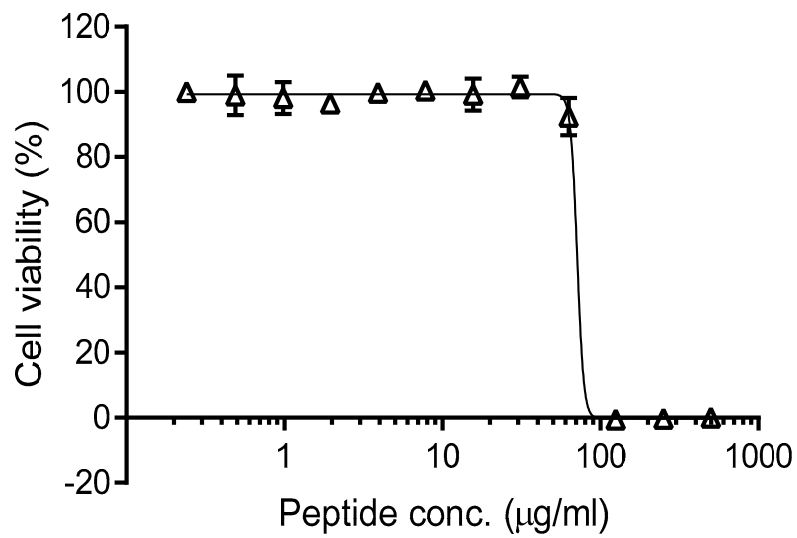

**Figure S5.** MIC (125 µg/ml) and IC<sub>50</sub> (71.27 µg/ml) of ε-Polylysine against *S. mutans* ( $R^2 = 1.0$ ).
